# Supplementary material
Source: publisher figshare collection journal article supplement (https://gsajournals.figshare.com/ndownloader/files/14217740)
Supplement: Supplementary file 1 [file 14217740]

## Sheet: recRates5MbGrids
Table S1: Recombination rate at grid points on Ae. tauschii pseudomolecules
Pseudomolecule	Grid point (bp)	Recombination rate (cM/Mb)
1	163917	1.56617
1	214123	1.57718
1	264330	1.58826
1	314536	1.59942
1	364742	1.61064
1	414949	1.62192
1	465155	1.63327
1	515361	1.64467
1	565567	1.65064
1	615774	1.65768
1	665980	1.66946
1	716186	1.68056
1	766393	1.68821
1	816599	1.70024
1	866805	1.71231
1	917012	1.72442
1	967218	1.73656
1	1017424	1.74873
1	1067630	1.76093
1	1117837	1.77315
1	1168043	1.7854
1	1218249	1.79767
1	1268456	1.80995
1	1318662	1.82155
1	1368868	1.8335
1	1419075	1.84587
1	1469281	1.85825
1	1519487	1.87064
1	1569693	1.88303
1	1619900	1.89542
1	1670106	1.90718
1	1720312	1.91957
1	1770519	1.932
1	1820725	1.94442
1	1870931	1.95684
1	1921138	1.96925
1	1971344	1.98165
1	2021550	1.99404
1	2071757	2.00642
1	2121963	2.01879
1	2172169	2.03092
1	2222375	2.04323
1	2272582	2.05556
1	2322788	2.06788
1	2372994	2.08017
1	2423201	2.09245
1	2473407	2.10469
1	2523613	2.11692
1	2573820	2.12911
1	2624026	2.14128
1	2674232	2.15342
1	2724438	2.16551
1	2774645	2.17757
1	2824851	2.18963
1	2875057	2.20165
1	2925264	2.21363
1	2975470	2.22558
1	3025676	2.23749
1	3075883	2.24936
1	3126089	2.26119
1	3176295	2.27298
1	3226501	2.28473
1	3276708	2.29644
1	3326914	2.3081
1	3377120	2.31971
1	3427327	2.33128
1	3477533	2.34281
1	3527739	2.35428
1	3577946	2.36571
1	3628152	2.37709
1	3678358	2.38841
1	3728565	2.39969
1	3778771	2.41086
1	3828977	2.42201
1	3879183	2.43311
1	3929390	2.44416
1	3979596	2.45503
1	4029802	2.46595
1	4080009	2.47681
1	4130215	2.48761
1	4180421	2.49835
1	4230628	2.50903
1	4280834	2.51964
1	4331040	2.53019
1	4381246	2.54067
1	4431453	2.55109
1	4481659	2.56144
1	4531865	2.57172
1	4582072	2.58193
1	4632278	2.59208
1	4682484	2.60215
1	4732691	2.61215
1	4782897	2.62208
1	4833103	2.63194
1	4883309	2.64173
1	4933516	2.65144
1	4983722	2.66107
1	5033928	2.67063
1	5084135	2.68011
1	5134341	2.68951
1	5184547	2.69883
1	5234754	2.70807
1	5284960	2.71723
1	5335166	2.72631
1	5385373	2.73531
1	5435579	2.74422
1	5485785	2.75275
1	5535991	2.76104
1	5586198	2.76967
1	5636404	2.7782
1	5686610	2.78664
1	5736817	2.795
1	5787023	2.80326
1	5837229	2.81143
1	5887436	2.81951
1	5937642	2.82749
1	5987848	2.83538
1	6038054	2.84318
1	6088261	2.85088
1	6138467	2.85847
1	6188673	2.86598
1	6238880	2.87338
1	6289086	2.88068
1	6339292	2.88788
1	6389499	2.89497
1	6439705	2.90197
1	6489911	2.90886
1	6540117	2.91564
1	6590324	2.92232
1	6640530	2.92825
1	6690736	2.93393
1	6740943	2.94023
1	6791149	2.94642
1	6841355	2.95249
1	6891562	2.95845
1	6941768	2.96429
1	6991974	2.97002
1	7042181	2.97527
1	7092387	2.97916
1	7142593	2.98069
1	7192799	2.98505
1	7243006	2.98995
1	7293212	2.99419
1	7343418	2.9977
1	7393625	3.00215
1	7443831	3.00646
1	7494037	3.01064
1	7544244	3.01468
1	7594450	3.01859
1	7644656	3.02236
1	7694862	3.02598
1	7745069	3.02947
1	7795275	3.03281
1	7845481	3.03602
1	7895688	3.03907
1	7945894	3.04198
1	7996100	3.04474
1	8046307	3.04736
1	8096513	3.04982
1	8146719	3.05214
1	8196925	3.0543
1	8247132	3.05631
1	8297338	3.05817
1	8347544	3.05987
1	8397751	3.06141
1	8447957	3.06176
1	8498163	3.06179
1	8548370	3.06279
1	8598576	3.06363
1	8648782	3.06428
1	8698989	3.05816
1	8749195	3.05824
1	8799401	3.05822
1	8849607	3.05803
1	8899814	3.05766
1	8950020	3.05713
1	9000226	3.05641
1	9050433	3.05553
1	9100639	3.05446
1	9150845	3.05322
1	9201052	3.0518
1	9251258	3.05021
1	9301464	3.04843
1	9351670	3.04647
1	9401877	3.04433
1	9452083	3.03633
1	9502289	3.03222
1	9552496	3.02935
1	9602702	3.0263
1	9652908	3.02306
1	9703115	3.01964
1	9753321	3.01603
1	9803527	3.01223
1	9853733	3.00825
1	9903940	3.00408
1	9954146	2.99972
1	10004352	2.99518
1	10054559	2.99044
1	10104765	2.98497
1	10154971	2.978
1	10205178	2.97265
1	10255384	2.96712
1	10305590	2.95987
1	10355797	2.95309
1	10406003	2.94695
1	10456209	2.94063
1	10506415	2.93412
1	10556622	2.92744
1	10606828	2.92056
1	10657034	2.91351
1	10707241	2.90531
1	10757447	2.89651
1	10807653	2.88888
1	10857860	2.88107
1	10908066	2.87308
1	10958272	2.86492
1	11008478	2.85659
1	11058685	2.84808
1	11108891	2.83941
1	11159097	2.83057
1	11209304	2.82156
1	11259510	2.81239
1	11309716	2.80306
1	11359923	2.79356
1	11410129	2.78307
1	11460335	2.7719
1	11510541	2.7619
1	11560748	2.75176
1	11610954	2.74146
1	11661160	2.73101
1	11711367	2.72042
1	11761573	2.70969
1	11811779	2.69882
1	11861986	2.68781
1	11912192	2.67667
1	11962398	2.66539
1	12012605	2.65398
1	12062811	2.64245
1	12113017	2.63079
1	12163223	2.61901
1	12213430	2.60711
1	12263636	2.59509
1	12313842	2.58297
1	12364049	2.57073
1	12414255	2.55838
1	12464461	2.54592
1	12514668	2.53337
1	12564874	2.52071
1	12615080	2.50796
1	12665286	2.49512
1	12715493	2.48218
1	12765699	2.46915
1	12815905	2.45604
1	12866112	2.44285
1	12916318	2.42958
1	12966524	2.41623
1	13016731	2.40281
1	13066937	2.38931
1	13117143	2.37575
1	13167349	2.36212
1	13217556	2.34843
1	13267762	2.33467
1	13317968	2.32086
1	13368175	2.30699
1	13418381	2.29308
1	13468587	2.27724
1	13518794	2.26237
1	13569000	2.24829
1	13619206	2.23418
1	13669413	2.22002
1	13719619	2.20583
1	13769825	2.19161
1	13820031	2.17735
1	13870238	2.16306
1	13920444	2.14875
1	13970650	2.13441
1	14020857	2.12004
1	14071063	2.10566
1	14121269	2.09081
1	14171476	2.07578
1	14221682	2.06135
1	14271888	2.0469
1	14322094	2.03244
1	14372301	2.01769
1	14422507	2.00257
1	14472713	1.98809
1	14522920	1.97362
1	14573126	1.95914
1	14623332	1.94466
1	14673539	1.93019
1	14723745	1.91573
1	14773951	1.90127
1	14824157	1.88682
1	14874364	1.87238
1	14924570	1.85795
1	14974776	1.84354
1	15024983	1.82914
1	15075189	1.81476
1	15125395	1.8004
1	15175602	1.78606
1	15225808	1.77174
1	15276014	1.75745
1	15326221	1.74318
1	15376427	1.72893
1	15426633	1.71472
1	15476839	1.70054
1	15527046	1.68638
1	15577252	1.67188
1	15627458	1.65764
1	15677665	1.6436
1	15727871	1.62938
1	15778077	1.61514
1	15828284	1.60121
1	15878490	1.58733
1	15928696	1.57348
1	15978902	1.55969
1	16029109	1.54594
1	16079315	1.53224
1	16129521	1.51858
1	16179728	1.50498
1	16229934	1.49143
1	16280140	1.47794
1	16330347	1.4645
1	16380553	1.45112
1	16430759	1.4378
1	16480965	1.42432
1	16531172	1.41033
1	16581378	1.39723
1	16631584	1.38418
1	16681791	1.37121
1	16731997	1.3583
1	16782203	1.34547
1	16832410	1.33249
1	16882616	1.31973
1	16932822	1.30714
1	16983029	1.29463
1	17033235	1.28219
1	17083441	1.26984
1	17133647	1.25757
1	17183854	1.24539
1	17234060	1.2333
1	17284266	1.22129
1	17334473	1.20937
1	17384679	1.19754
1	17434885	1.18581
1	17485092	1.17419
1	17535298	1.16269
1	17585504	1.15127
1	17635710	1.13996
1	17685917	1.12874
1	17736123	1.11763
1	17786329	1.10663
1	17836536	1.09573
1	17886742	1.08494
1	17936948	1.07426
1	17987155	1.06369
1	18037361	1.05323
1	18087567	1.04288
1	18137773	1.03266
1	18187980	1.02254
1	18238186	1.01255
1	18288392	1.00267
1	18338599	0.992914
1	18388805	0.983278
1	18439011	0.973764
1	18489218	0.964372
1	18539424	0.955104
1	18589630	0.94596
1	18639837	0.936941
1	18690043	0.928048
1	18740249	0.919281
1	18790455	0.91064
1	18840662	0.902127
1	18890868	0.894206
1	18941074	0.887017
1	18991281	0.878957
1	19041487	0.871027
1	19091693	0.863225
1	19141900	0.855551
1	19192106	0.848088
1	19242312	0.841013
1	19292518	0.833739
1	19342725	0.826592
1	19392931	0.81957
1	19443137	0.812673
1	19493344	0.805901
1	19543550	0.799252
1	19593756	0.792724
1	19643963	0.786317
1	19694169	0.780029
1	19744375	0.773859
1	19794581	0.767805
1	19844788	0.761866
1	19894994	0.75604
1	19945200	0.750324
1	19995407	0.744718
1	20045613	0.739219
1	20095819	0.733825
1	20146026	0.728534
1	20196232	0.720219
1	20246438	0.71122
1	20296645	0.706049
1	20346851	0.70143
1	20397057	0.696895
1	20447263	0.692441
1	20497470	0.68799
1	20547676	0.681901
1	20597882	0.6777
1	20648089	0.673625
1	20698295	0.669617
1	20748501	0.665673
1	20798708	0.661791
1	20848914	0.657968
1	20899120	0.654201
1	20949326	0.649064
1	20999533	0.645239
1	21049739	0.641701
1	21099945	0.638208
1	21150152	0.634164
1	21200358	0.630859
1	21250564	0.627739
1	21300771	0.624767
1	21350977	0.621634
1	21401183	0.618401
1	21451389	0.615198
1	21501596	0.612298
1	21551802	0.609283
1	21602008	0.606156
1	21652215	0.603053
1	21702421	0.59997
1	21752627	0.596906
1	21802834	0.593861
1	21853040	0.590832
1	21903246	0.587897
1	21953453	0.585165
1	22003659	0.582179
1	22053865	0.579204
1	22104071	0.576241
1	22154278	0.573288
1	22204484	0.570082
1	22254690	0.567028
1	22304897	0.564119
1	22355103	0.561216
1	22405309	0.558319
1	22455516	0.55561
1	22505722	0.552815
1	22555928	0.550163
1	22606134	0.547311
1	22656341	0.544432
1	22706547	0.541556
1	22756753	0.538683
1	22806960	0.535812
1	22857166	0.532943
1	22907372	0.530076
1	22957579	0.527211
1	23007785	0.524446
1	23057991	0.521689
1	23108197	0.518827
1	23158404	0.515968
1	23208610	0.513109
1	23258816	0.510253
1	23309023	0.507398
1	23359229	0.504544
1	23409435	0.501692
1	23459642	0.498949
1	23509848	0.496162
1	23560054	0.493316
1	23610261	0.490484
1	23660467	0.487646
1	23710673	0.48481
1	23760879	0.481976
1	23811086	0.479145
1	23861292	0.476317
1	23911498	0.473505
1	23961705	0.470758
1	24011911	0.468095
1	24062117	0.465359
1	24112324	0.462548
1	24162530	0.459742
1	24212736	0.45694
1	24262942	0.45418
1	24313149	0.451407
1	24363355	0.448686
1	24413561	0.446012
1	24463768	0.443261
1	24513974	0.440492
1	24564180	0.437729
1	24614387	0.434972
1	24664593	0.432221
1	24714799	0.429476
1	24765005	0.426758
1	24815212	0.424112
1	24865418	0.421452
1	24915624	0.418734
1	24965831	0.416079
1	25016037	0.413451
1	25066243	0.410756
1	25116450	0.408069
1	25166656	0.40539
1	25216862	0.40272
1	25267069	0.400059
1	25317275	0.397407
1	25367481	0.394765
1	25417687	0.392131
1	25467894	0.389508
1	25518100	0.386894
1	25568306	0.384291
1	25618513	0.381843
1	25668719	0.379307
1	25718925	0.376732
1	25769132	0.374168
1	25819338	0.371616
1	25869544	0.369074
1	25919750	0.366545
1	25969957	0.364027
1	26020163	0.361521
1	26070369	0.359027
1	26120576	0.356546
1	26170782	0.354077
1	26220988	0.351622
1	26271195	0.349179
1	26321401	0.346749
1	26371607	0.344333
1	26421813	0.341931
1	26472020	0.339543
1	26522226	0.337168
1	26572432	0.334808
1	26622639	0.332463
1	26672845	0.330209
1	26723051	0.328425
1	26773258	0.32616
1	26823464	0.323906
1	26873670	0.321895
1	26923877	0.319622
1	26974083	0.317364
1	27024289	0.315123
1	27074495	0.312899
1	27124702	0.310871
1	27174908	0.30917
1	27225114	0.306982
1	27275321	0.304812
1	27325527	0.302659
1	27375733	0.300524
1	27425940	0.298407
1	27476146	0.296309
1	27526352	0.294229
1	27576558	0.29228
1	27626765	0.290476
1	27676971	0.288444
1	27727177	0.286432
1	27777384	0.28444
1	27827590	0.282664
1	27877796	0.280826
1	27928003	0.278885
1	27978209	0.276964
1	28028415	0.275063
1	28078621	0.273185
1	28128828	0.271466
1	28179034	0.269816
1	28229240	0.268321
1	28279447	0.266515
1	28329653	0.264729
1	28379859	0.262964
1	28430066	0.261219
1	28480272	0.259496
1	28530478	0.257792
1	28580685	0.25611
1	28630891	0.254447
1	28681097	0.252806
1	28731303	0.251184
1	28781510	0.2496
1	28831716	0.248295
1	28881922	0.247002
1	28932129	0.24549
1	28982335	0.243961
1	29032541	0.242453
1	29082748	0.240964
1	29132954	0.239494
1	29183160	0.238044
1	29233366	0.236612
1	29283573	0.235199
1	29333779	0.233805
1	29383985	0.232429
1	29434192	0.231071
1	29484398	0.22973
1	29534604	0.228407
1	29584811	0.227102
1	29635017	0.225813
1	29685223	0.224541
1	29735429	0.223285
1	29785636	0.222046
1	29835842	0.220822
1	29886048	0.219705
1	29936255	0.218947
1	29986461	0.217796
1	30036667	0.216937
1	30086874	0.215771
1	30137080	0.21462
1	30187286	0.213483
1	30237493	0.21236
1	30287699	0.211251
1	30337905	0.210156
1	30388111	0.209073
1	30438318	0.208058
1	30488524	0.207137
1	30538730	0.206274
1	30588937	0.205255
1	30639143	0.204512
1	30689349	0.203846
1	30739556	0.202949
1	30789762	0.202011
1	30839968	0.201325
1	30890174	0.200334
1	30940381	0.199354
1	30990587	0.198385
1	31040793	0.197428
1	31091000	0.196481
1	31141206	0.195758
1	31191412	0.194973
1	31241619	0.194219
1	31291825	0.193525
1	31342031	0.192722
1	31392237	0.191819
1	31442444	0.190927
1	31492650	0.190044
1	31542856	0.189171
1	31593063	0.188431
1	31643269	0.187798
1	31693475	0.186943
1	31743682	0.186098
1	31793888	0.185556
1	31844094	0.184884
1	31894301	0.184062
1	31944507	0.18325
1	31994713	0.182447
1	32044919	0.182012
1	32095126	0.181332
1	32145332	0.180543
1	32195538	0.179763
1	32245745	0.17903
1	32295951	0.178435
1	32346157	0.177793
1	32396364	0.177056
1	32446570	0.176328
1	32496776	0.175609
1	32546982	0.174899
1	32597189	0.174198
1	32647395	0.173506
1	32697601	0.172823
1	32747808	0.172148
1	32798014	0.171482
1	32848220	0.170825
1	32898427	0.170176
1	32948633	0.169524
1	32998839	0.168879
1	33049045	0.168258
1	33099252	0.167645
1	33149458	0.16704
1	33199664	0.166444
1	33249871	0.165909
1	33300077	0.165408
1	33350283	0.164778
1	33400490	0.164172
1	33450696	0.163632
1	33500902	0.163101
1	33551109	0.162578
1	33601315	0.162063
1	33651521	0.161452
1	33701727	0.160953
1	33751934	0.160468
1	33802140	0.159991
1	33852346	0.159522
1	33902553	0.159062
1	33952759	0.15861
1	34002965	0.158167
1	34053172	0.157733
1	34103378	0.157308
1	34153584	0.156891
1	34203790	0.156468
1	34253997	0.155972
1	34304203	0.155463
1	34354409	0.155091
1	34404616	0.154727
1	34454822	0.154373
1	34505028	0.154027
1	34555235	0.153691
1	34605441	0.153363
1	34655647	0.153099
1	34705853	0.152883
1	34756060	0.152587
1	34806266	0.152301
1	34856472	0.152025
1	34906679	0.151758
1	34956885	0.151568
1	35007091	0.151396
1	35057298	0.151162
1	35107504	0.150938
1	35157710	0.15071
1	35207917	0.150504
1	35258123	0.150313
1	35308329	0.150132
1	35358535	0.149961
1	35408742	0.1498
1	35458948	0.14965
1	35509154	0.149511
1	35559361	0.149382
1	35609567	0.149264
1	35659773	0.149157
1	35709980	0.149061
1	35760186	0.148976
1	35810392	0.148912
1	35860598	0.14887
1	35910805	0.148818
1	35961011	0.148777
1	36011217	0.148747
1	36061424	0.148728
1	36111630	0.148721
1	36161836	0.148724
1	36212043	0.148739
1	36262249	0.148765
1	36312455	0.148802
1	36362661	0.14885
1	36412868	0.14891
1	36463074	0.148981
1	36513280	0.149063
1	36563487	0.149156
1	36613693	0.149383
1	36663899	0.149585
1	36714106	0.149744
1	36764312	0.149884
1	36814518	0.150035
1	36864725	0.150197
1	36914931	0.15037
1	36965137	0.150554
1	37015343	0.150748
1	37065550	0.150953
1	37115756	0.151169
1	37165962	0.151395
1	37216169	0.151886
1	37266375	0.152199
1	37316581	0.152526
1	37366788	0.152838
1	37416994	0.153119
1	37467200	0.153411
1	37517406	0.153712
1	37567613	0.154022
1	37617819	0.154342
1	37668025	0.154697
1	37718232	0.155162
1	37768438	0.155513
1	37818644	0.155872
1	37868851	0.156239
1	37919057	0.156623
1	37969263	0.157165
1	38019469	0.157679
1	38069676	0.158076
1	38119882	0.158552
1	38170088	0.159214
1	38220295	0.15976
1	38270501	0.160192
1	38320707	0.160742
1	38370914	0.161235
1	38421120	0.161677
1	38471326	0.162126
1	38521533	0.162582
1	38571739	0.163044
1	38621945	0.163513
1	38672151	0.163989
1	38722358	0.164471
1	38772564	0.164958
1	38822770	0.165452
1	38872977	0.165951
1	38923183	0.166455
1	38973389	0.166966
1	39023596	0.167481
1	39073802	0.168001
1	39124008	0.168526
1	39174214	0.169056
1	39224421	0.16959
1	39274627	0.170129
1	39324833	0.170671
1	39375040	0.171218
1	39425246	0.171769
1	39475452	0.17244
1	39525659	0.173078
1	39575865	0.173684
1	39626071	0.174404
1	39676277	0.174964
1	39726484	0.175526
1	39776690	0.176092
1	39826896	0.17666
1	39877103	0.17723
1	39927309	0.177803
1	39977515	0.178428
1	40027722	0.179182
1	40077928	0.179756
1	40128134	0.180332
1	40178341	0.180909
1	40228547	0.181487
1	40278753	0.182066
1	40328959	0.182646
1	40379166	0.183227
1	40429372	0.183808
1	40479578	0.18439
1	40529785	0.184971
1	40579991	0.185822
1	40630197	0.186661
1	40680404	0.187234
1	40730610	0.187863
1	40780816	0.188799
1	40831022	0.189362
1	40881229	0.189924
1	40931435	0.190485
1	40981641	0.191044
1	41031848	0.191605
1	41082054	0.19221
1	41132260	0.192761
1	41182467	0.19331
1	41232673	0.193855
1	41282879	0.194397
1	41333085	0.195026
1	41383292	0.195616
1	41433498	0.196145
1	41483704	0.196669
1	41533911	0.197188
1	41584117	0.197703
1	41634323	0.198212
1	41684530	0.198867
1	41734736	0.199373
1	41784942	0.199863
1	41835149	0.200347
1	41885355	0.200824
1	41935561	0.201294
1	41985767	0.201757
1	42035974	0.202212
1	42086180	0.20266
1	42136386	0.2031
1	42186593	0.203666
1	42236799	0.204111
1	42287005	0.20452
1	42337212	0.204918
1	42387418	0.205307
1	42437624	0.205686
1	42487830	0.206055
1	42538037	0.206413
1	42588243	0.206761
1	42638449	0.207097
1	42688656	0.207422
1	42738862	0.207825
1	42789068	0.208207
1	42839275	0.208493
1	42889481	0.208766
1	42939687	0.209026
1	42989893	0.209274
1	43040100	0.209508
1	43090306	0.209728
1	43140512	0.209935
1	43190719	0.210128
1	43240925	0.210307
1	43291131	0.210471
1	43341338	0.210621
1	43391544	0.210756
1	43441750	0.210876
1	43491957	0.210981
1	43542163	0.211071
1	43592369	0.211146
1	43642575	0.211205
1	43692782	0.211249
1	43742988	0.211277
1	43793194	0.211426
1	43843401	0.211455
1	43893607	0.211431
1	43943813	0.211391
1	43994020	0.21148
1	44044226	0.211406
1	44094432	0.211315
1	44144638	0.211208
1	44194845	0.211085
1	44245051	0.210947
1	44295257	0.210698
1	44345464	0.21051
1	44395670	0.210322
1	44445876	0.210077
1	44496083	0.209789
1	44546289	0.209552
1	44596495	0.209301
1	44646701	0.209035
1	44696908	0.208755
1	44747114	0.208461
1	44797320	0.208153
1	44847527	0.207831
1	44897733	0.207494
1	44947939	0.206827
1	44998146	0.206452
1	45048352	0.206073
1	45098558	0.205682
1	45148765	0.205279
1	45198971	0.204865
1	45249177	0.20444
1	45299383	0.204004
1	45349590	0.203558
1	45399796	0.203101
1	45450002	0.202635
1	45500209	0.202191
1	45550415	0.201749
1	45600621	0.201252
1	45650828	0.200747
1	45701034	0.200234
1	45751240	0.199713
1	45801446	0.199186
1	45851653	0.198651
1	45901859	0.19811
1	45952065	0.197563
1	46002272	0.19701
1	46052478	0.196452
1	46102684	0.195888
1	46152891	0.19532
1	46203097	0.194747
1	46253303	0.19417
1	46303509	0.193589
1	46353716	0.193004
1	46403922	0.192416
1	46454128	0.191815
1	46504335	0.191106
1	46554541	0.190509
1	46604747	0.18991
1	46654954	0.189315
1	46705160	0.188717
1	46755366	0.188111
1	46805573	0.187505
1	46855779	0.186898
1	46905985	0.18629
1	46956191	0.185682
1	47006398	0.185074
1	47056604	0.184466
1	47106810	0.183855
1	47157017	0.183228
1	47207223	0.182612
1	47257429	0.182002
1	47307636	0.181389
1	47357842	0.180772
1	47408048	0.180166
1	47458254	0.179562
1	47508461	0.17896
1	47558667	0.178361
1	47608873	0.177765
1	47659080	0.177172
1	47709286	0.176581
1	47759492	0.175994
1	47809699	0.17541
1	47859905	0.174829
1	47910111	0.174252
1	47960317	0.173679
1	48010524	0.173109
1	48060730	0.172543
1	48110936	0.171982
1	48161143	0.171424
1	48211349	0.170871
1	48261555	0.170323
1	48311762	0.169779
1	48361968	0.169239
1	48412174	0.168705
1	48462381	0.168157
1	48512587	0.167611
1	48562793	0.167091
1	48612999	0.166577
1	48663206	0.166039
1	48713412	0.165358
1	48763618	0.16486
1	48813825	0.164369
1	48864031	0.163884
1	48914237	0.163406
1	48964444	0.162933
1	49014650	0.162467
1	49064856	0.162007
1	49115062	0.161553
1	49165269	0.161105
1	49215475	0.160665
1	49265681	0.160214
1	49315888	0.159763
1	49366094	0.159341
1	49416300	0.158926
1	49466507	0.158376
1	49516713	0.157939
1	49566919	0.157547
1	49617125	0.157163
1	49667332	0.156786
1	49717538	0.156415
1	49767744	0.156051
1	49817951	0.155695
1	49868157	0.155345
1	49918363	0.155002
1	49968570	0.154666
1	50018776	0.154337
1	50068982	0.154015
1	50119189	0.153689
1	50169395	0.153343
1	50219601	0.153043
1	50269807	0.152734
1	50320014	0.152399
1	50370220	0.152102
1	50420426	0.151828
1	50470633	0.151561
1	50520839	0.1513
1	50571045	0.151045
1	50621252	0.150796
1	50671458	0.150553
1	50721664	0.150293
1	50771870	0.150032
1	50822077	0.149808
1	50872283	0.149588
1	50922489	0.149374
1	50972696	0.149165
1	51022902	0.148961
1	51073108	0.148761
1	51123315	0.148565
1	51173521	0.148373
1	51223727	0.148186
1	51273933	0.148002
1	51324140	0.147821
1	51374346	0.147644
1	51424552	0.147443
1	51474759	0.1472
1	51524965	0.14703
1	51575171	0.146863
1	51625378	0.146697
1	51675584	0.146532
1	51725790	0.146369
1	51775997	0.146207
1	51826203	0.146045
1	51876409	0.145884
1	51926615	0.145723
1	51976822	0.145562
1	52027028	0.1454
1	52077234	0.145238
1	52127441	0.145075
1	52177647	0.14491
1	52227853	0.144744
1	52278060	0.144576
1	52328266	0.144406
1	52378472	0.144234
1	52428678	0.144059
1	52478885	0.143881
1	52529091	0.1437
1	52579297	0.143516
1	52629504	0.143328
1	52679710	0.143136
1	52729916	0.142939
1	52780123	0.142691
1	52830329	0.142429
1	52880535	0.142214
1	52930741	0.141994
1	52980948	0.141768
1	53031154	0.141536
1	53081360	0.141298
1	53131567	0.141054
1	53181773	0.140804
1	53231979	0.140547
1	53282186	0.140283
1	53332392	0.140012
1	53382598	0.139734
1	53432805	0.139449
1	53483011	0.139145
1	53533217	0.13884
1	53583423	0.138534
1	53633630	0.138219
1	53683836	0.137897
1	53734042	0.137566
1	53784249	0.137227
1	53834455	0.13688
1	53884661	0.136471
1	53934868	0.136024
1	53985074	0.135646
1	54035280	0.13526
1	54085486	0.134865
1	54135693	0.134453
1	54185899	0.134029
1	54236105	0.133608
1	54286312	0.133178
1	54336518	0.132739
1	54386724	0.132284
1	54436931	0.131814
1	54487137	0.131348
1	54537343	0.130873
1	54587549	0.130389
1	54637756	0.129897
1	54687962	0.129326
1	54738168	0.128747
1	54788375	0.128224
1	54838581	0.127693
1	54888787	0.127154
1	54938994	0.126606
1	54989200	0.126049
1	55039406	0.125485
1	55089613	0.124911
1	55139819	0.12433
1	55190025	0.123658
1	55240231	0.123018
1	55290438	0.122411
1	55340644	0.121797
1	55390850	0.121175
1	55441057	0.120546
1	55491263	0.11991
1	55541469	0.119267
1	55591676	0.118595
1	55641882	0.117929
1	55692088	0.117266
1	55742294	0.11658
1	55792501	0.115884
1	55842707	0.115202
1	55892913	0.11449
1	55943120	0.113728
1	55993326	0.113031
1	56043532	0.112328
1	56093739	0.111621
1	56143945	0.11091
1	56194151	0.110194
1	56244357	0.109475
1	56294564	0.108751
1	56344770	0.108025
1	56394976	0.107295
1	56445183	0.106562
1	56495389	0.105788
1	56545595	0.104886
1	56595802	0.104144
1	56646008	0.103401
1	56696214	0.102656
1	56746421	0.101909
1	56796627	0.101162
1	56846833	0.10033
1	56897039	0.0995436
1	56947246	0.0987942
1	56997452	0.098045
1	57047658	0.0972962
1	57097865	0.0965482
1	57148071	0.0958012
1	57198277	0.0950556
1	57248484	0.0943116
1	57298690	0.0935695
1	57348896	0.0928296
1	57399102	0.0920232
1	57449309	0.0912784
1	57499515	0.0905468
1	57549721	0.0897481
1	57599928	0.0890105
1	57650134	0.0882901
1	57700340	0.0875742
1	57750547	0.0868629
1	57800753	0.0861961
1	57850959	0.0855101
1	57901165	0.0848199
1	57951372	0.0841358
1	58001578	0.083458
1	58051784	0.0827867
1	58101991	0.0821539
1	58152197	0.0815442
1	58202403	0.0809003
1	58252610	0.0802642
1	58302816	0.0796363
1	58353022	0.0790169
1	58403229	0.0784062
1	58453435	0.0778046
1	58503641	0.0772121
1	58553847	0.0766292
1	58604054	0.0760561
1	58654260	0.075493
1	58704466	0.0749655
1	58754673	0.0745146
1	58804879	0.0739891
1	58855085	0.0734748
1	58905292	0.0728456
1	58955498	0.0720572
1	59005704	0.0715817
1	59055910	0.0711185
1	59106117	0.0706677
1	59156323	0.0702297
1	59206529	0.0697828
1	59256736	0.0692807
1	59306942	0.0688834
1	59357148	0.0684996
1	59407355	0.0681295
1	59457561	0.0677732
1	59507767	0.067431
1	59557973	0.0671029
1	59608180	0.0667891
1	59658386	0.0666014
1	59708592	0.0663909
1	59758799	0.0661275
1	59809005	0.0658791
1	59859211	0.0656458
1	59909418	0.0654278
1	59959624	0.065225
1	60009830	0.0650377
1	60060037	0.0648659
1	60110243	0.0647098
1	60160449	0.0645695
1	60210655	0.0644449
1	60260862	0.0643363
1	60311068	0.0642436
1	60361274	0.064167
1	60411481	0.0641065
1	60461687	0.0640623
1	60511893	0.0640342
1	60562100	0.0640225
1	60612306	0.0640271
1	60662512	0.0640481
1	60712718	0.0640855
1	60762925	0.0641393
1	60813131	0.0642096
1	60863337	0.0642964
1	60913544	0.0643997
1	60963750	0.0645196
1	61013956	0.0646559
1	61064163	0.0648087
1	61114369	0.064978
1	61164575	0.0651638
1	61214781	0.0655171
1	61264988	0.0657584
1	61315194	0.065987
1	61365400	0.0664195
1	61415607	0.0667059
1	61465813	0.0670085
1	61516019	0.0672828
1	61566226	0.0675997
1	61616432	0.067955
1	61666638	0.0683261
1	61716845	0.0688396
1	61767051	0.069328
1	61817257	0.0697497
1	61867463	0.0701866
1	61917670	0.0706334
1	61967876	0.0710873
1	62018082	0.0715733
1	62068289	0.0720738
1	62118495	0.0725885
1	62168701	0.0731172
1	62218908	0.0736597
1	62269114	0.0742631
1	62319320	0.0749826
1	62369526	0.0755678
1	62419733	0.0761658
1	62469939	0.0768069
1	62520145	0.0774505
1	62570352	0.0781431
1	62620558	0.0788038
1	62670764	0.0794679
1	62720971	0.0802635
1	62771177	0.0810051
1	62821383	0.0817012
1	62871589	0.0824068
1	62921796	0.0831214
1	62972002	0.0838448
1	63022208	0.0846271
1	63072415	0.085427
1	63122621	0.0861765
1	63172827	0.0869329
1	63223034	0.0876957
1	63273240	0.0884645
1	63323446	0.0892388
1	63373653	0.0900182
1	63423859	0.0908021
1	63474065	0.0916945
1	63524271	0.0925509
1	63574478	0.0933466
1	63624684	0.0941448
1	63674890	0.0949449
1	63725097	0.0957464
1	63775303	0.0965489
1	63825509	0.0973517
1	63875716	0.0981544
1	63925922	0.0989564
1	63976128	0.0997573
1	64026334	0.100783
1	64076541	0.101704
1	64126747	0.102499
1	64176953	0.10329
1	64227160	0.104077
1	64277366	0.104859
1	64327572	0.105636
1	64377779	0.106481
1	64427985	0.107317
1	64478191	0.108075
1	64528397	0.108826
1	64578604	0.109568
1	64628810	0.110302
1	64679016	0.111027
1	64729223	0.111742
1	64779429	0.112447
1	64829635	0.113145
1	64879842	0.113994
1	64930048	0.114665
1	64980254	0.115324
1	65030461	0.115971
1	65080667	0.116604
1	65130873	0.117224
1	65181079	0.117831
1	65231286	0.118423
1	65281492	0.119001
1	65331698	0.119564
1	65381905	0.120111
1	65432111	0.120643
1	65482317	0.121159
1	65532524	0.121659
1	65582730	0.122143
1	65632936	0.12261
1	65683142	0.123059
1	65733349	0.123492
1	65783555	0.123907
1	65833761	0.124304
1	65883968	0.124683
1	65934174	0.125044
1	65984380	0.125387
1	66034587	0.125472
1	66084793	0.125642
1	66134999	0.125622
1	66185205	0.125787
1	66235412	0.126001
1	66285618	0.126195
1	66335824	0.126369
1	66386031	0.126524
1	66436237	0.126658
1	66486443	0.126773
1	66536650	0.126868
1	66586856	0.126943
1	66637062	0.126998
1	66687269	0.127033
1	66737475	0.127048
1	66787681	0.127044
1	66837887	0.127019
1	66888094	0.126592
1	66938300	0.126461
1	66988506	0.126365
1	67038713	0.126249
1	67088919	0.126114
1	67139125	0.125959
1	67189332	0.125786
1	67239538	0.125594
1	67289744	0.125383
1	67339950	0.125153
1	67390157	0.124906
1	67440363	0.124617
1	67490569	0.124128
1	67540776	0.123821
1	67590982	0.123496
1	67641188	0.123154
1	67691395	0.122794
1	67741601	0.122418
1	67791807	0.122025
1	67842013	0.121616
1	67892220	0.12119
1	67942426	0.120748
1	67992632	0.12029
1	68042839	0.119816
1	68093045	0.11933
1	68143251	0.118943
1	68193458	0.118324
1	68243664	0.117657
1	68293870	0.1171
1	68344077	0.116529
1	68394283	0.115945
1	68444489	0.115347
1	68494695	0.114736
1	68544902	0.114111
1	68595108	0.113474
1	68645314	0.112825
1	68695521	0.112163
1	68745727	0.111455
1	68795933	0.110601
1	68846140	0.109902
1	68896346	0.109246
1	68946552	0.108535
1	68996758	0.107798
1	69046965	0.10705
1	69097171	0.106292
1	69147377	0.105358
1	69197584	0.104384
1	69247790	0.103594
1	69297996	0.102726
1	69348203	0.101819
1	69398409	0.101002
1	69448615	0.100176
1	69498821	0.0993428
1	69549028	0.0985017
1	69599234	0.0976533
1	69649440	0.0967977
1	69699647	0.0959352
1	69749853	0.0950661
1	69800059	0.0941906
1	69850266	0.093201
1	69900472	0.0921505
1	69950678	0.0912535
1	70000885	0.0903514
1	70051091	0.0894446
1	70101297	0.0885333
1	70151503	0.0876178
1	70201710	0.0866982
1	70251916	0.085775
1	70302122	0.0848484
1	70352329	0.0839187
1	70402535	0.082986
1	70452741	0.0820404
1	70502948	0.0810735
1	70553154	0.0800886
1	70603360	0.0791404
1	70653566	0.0781927
1	70703773	0.0772441
1	70753979	0.076295
1	70804185	0.0753455
1	70854392	0.0743959
1	70904598	0.0734467
1	70954804	0.0724979
1	71005011	0.0715501
1	71055217	0.0706033
1	71105423	0.069658
1	71155629	0.0687144
1	71205836	0.0677728
1	71256042	0.0668336
1	71306248	0.0658639
1	71356455	0.0648655
1	71406661	0.0639337
1	71456867	0.0629783
1	71507074	0.0620419
1	71557280	0.0611242
1	71607486	0.0602111
1	71657693	0.0593029
1	71707899	0.0584001
1	71758105	0.0575027
1	71808311	0.0565401
1	71858518	0.0555766
1	71908724	0.0547
1	71958930	0.0538304
1	72009137	0.052968
1	72059343	0.0521131
1	72109549	0.0512659
1	72159756	0.0504268
1	72209962	0.0495959
1	72260168	0.0487347
1	72310374	0.0477444
1	72360581	0.0468216
1	72410787	0.0460294
1	72460993	0.045247
1	72511200	0.0444744
1	72561406	0.0437121
1	72611612	0.0429601
1	72661819	0.0422187
1	72712025	0.041488
1	72762231	0.0407682
1	72812437	0.0400596
1	72862644	0.0393622
1	72912850	0.0386763
1	72963056	0.0380019
1	73013263	0.0373638
1	73063469	0.0367398
1	73113675	0.0361044
1	73163882	0.0354812
1	73214088	0.0348702
1	73264294	0.0341751
1	73314501	0.0334477
1	73364707	0.0326621
1	73414913	0.0320831
1	73465119	0.031546
1	73515326	0.0310216
1	73565532	0.0305099
1	73615738	0.0300111
1	73665945	0.0295252
1	73716151	0.0291032
1	73766357	0.0286757
1	73816564	0.0282318
1	73866770	0.0278007
1	73916976	0.0273826
1	73967182	0.0269773
1	74017389	0.0266796
1	74067595	0.026387
1	74117801	0.0260265
1	74168008	0.0256788
1	74218214	0.0253539
1	74268420	0.0251141
1	74318627	0.0248073
1	74368833	0.0245131
1	74419039	0.0242313
1	74469245	0.0239618
1	74519452	0.0237046
1	74569658	0.0234596
1	74619864	0.0232266
1	74670071	0.0229303
1	74720277	0.0225947
1	74770483	0.0224042
1	74820690	0.022225
1	74870896	0.0221833
1	74921102	0.022108
1	74971309	0.0218715
1	75021515	0.0216416
1	75071721	0.02153
1	75121927	0.0214288
1	75172134	0.0213379
1	75222340	0.0212571
1	75272546	0.0212844
1	75322753	0.0212304
1	75372959	0.021181
1	75423165	0.0211411
1	75473372	0.0211272
1	75523578	0.0211904
1	75573784	0.0211797
1	75623990	0.0211777
1	75674197	0.0211843
1	75724403	0.0211993
1	75774609	0.0212226
1	75824816	0.0212538
1	75875022	0.021293
1	75925228	0.0213398
1	75975435	0.0213941
1	76025641	0.0214557
1	76075847	0.0215244
1	76126053	0.0216001
1	76176260	0.0217306
1	76226466	0.0218656
1	76276672	0.0219622
1	76326879	0.0220649
1	76377085	0.0221737
1	76427291	0.0222882
1	76477498	0.0224084
1	76527704	0.0225339
1	76577910	0.0226646
1	76628117	0.0227299
1	76678323	0.0228542
1	76728529	0.0230044
1	76778735	0.0231588
1	76828942	0.0233174
1	76879148	0.0234798
1	76929354	0.0236459
1	76979561	0.0238156
1	77029767	0.0239886
1	77079973	0.0241648
1	77130180	0.0243439
1	77180386	0.0245258
1	77230592	0.0246806
1	77280798	0.0248769
1	77331005	0.0250738
1	77381211	0.0252723
1	77431417	0.0254724
1	77481624	0.0256737
1	77531830	0.0258762
1	77582036	0.0260797
1	77632243	0.0262841
1	77682449	0.0264856
1	77732655	0.0266766
1	77782861	0.0268852
1	77833068	0.0270938
1	77883274	0.0273023
1	77933480	0.0275104
1	77983687	0.027718
1	78033893	0.0279251
1	78084099	0.0281541
1	78134306	0.0283819
1	78184512	0.0285855
1	78234718	0.0288048
1	78284925	0.0290373
1	78335131	0.0292374
1	78385337	0.0294357
1	78435543	0.0296319
1	78485750	0.0298259
1	78535956	0.0300176
1	78586162	0.0302069
1	78636369	0.0303937
1	78686575	0.0305777
1	78736781	0.0307589
1	78786988	0.0309372
1	78837194	0.0311125
1	78887400	0.0312846
1	78937606	0.0314534
1	78987813	0.0316188
1	79038019	0.0317808
1	79088225	0.0319392
1	79138432	0.0320939
1	79188638	0.0322448
1	79238844	0.0323918
1	79289051	0.0325349
1	79339257	0.0326739
1	79389463	0.0328088
1	79439669	0.0329395
1	79489876	0.0330659
1	79540082	0.033188
1	79590288	0.0333056
1	79640495	0.0334188
1	79690701	0.0335275
1	79740907	0.0336315
1	79791114	0.0337309
1	79841320	0.0338256
1	79891526	0.0339155
1	79941733	0.0340007
1	79991939	0.0340811
1	80042145	0.0341566
1	80092351	0.0342272
1	80142558	0.0342929
1	80192764	0.0343537
1	80242970	0.0344095
1	80293177	0.0344603
1	80343383	0.0345062
1	80393589	0.034547
1	80443796	0.0345829
1	80494002	0.0346138
1	80544208	0.0346396
1	80594414	0.0346605
1	80644621	0.0346763
1	80694827	0.0346851
1	80745033	0.0346736
1	80795240	0.0347373
1	80845446	0.0347299
1	80895652	0.0347076
1	80945859	0.0346658
1	80996065	0.0346422
1	81046271	0.0346202
1	81096477	0.0346591
1	81146684	0.0346188
1	81196890	0.0345738
1	81247096	0.0345241
1	81297303	0.0344697
1	81347509	0.0344106
1	81397715	0.0343469
1	81447922	0.0342787
1	81498128	0.0342059
1	81548334	0.0341287
1	81598541	0.034047
1	81648747	0.0339609
1	81698953	0.0338705
1	81749159	0.0337758
1	81799366	0.0336768
1	81849572	0.0335736
1	81899778	0.0334663
1	81949985	0.0333549
1	82000191	0.0332395
1	82050397	0.03312
1	82100604	0.0329966
1	82150810	0.0328692
1	82201016	0.03275
1	82251222	0.0326751
1	82301429	0.0325341
1	82351635	0.0323894
1	82401841	0.0322411
1	82452048	0.0320893
1	82502254	0.031934
1	82552460	0.0317753
1	82602667	0.0315948
1	82652873	0.0313987
1	82703079	0.0312288
1	82753285	0.0310556
1	82803492	0.0308793
1	82853698	0.0306999
1	82903904	0.0305173
1	82954111	0.0303317
1	83004317	0.0301431
1	83054523	0.0299516
1	83104730	0.0297572
1	83154936	0.0295152
1	83205142	0.029311
1	83255349	0.0291072
1	83305555	0.0288321
1	83355761	0.0285421
1	83405967	0.0282941
1	83456174	0.0280765
1	83506380	0.0278563
1	83556586	0.0276278
1	83606793	0.0273624
1	83656999	0.0270971
1	83707205	0.0268661
1	83757412	0.0266318
1	83807618	0.0263581
1	83857824	0.0261201
1	83908030	0.0258801
1	83958237	0.0256381
1	84008443	0.0253942
1	84058649	0.0251455
1	84108856	0.024864
1	84159062	0.0246143
1	84209268	0.0243629
1	84259475	0.0241099
1	84309681	0.0238968
1	84359887	0.0236455
1	84410093	0.0233808
1	84460300	0.0231085
1	84510506	0.0228742
1	84560712	0.0226084
1	84610919	0.0223417
1	84661125	0.022074
1	84711331	0.0218055
1	84761538	0.0215362
1	84811744	0.0212663
1	84861950	0.0209956
1	84912157	0.0207254
1	84962363	0.0205643
1	85012569	0.0202886
1	85062775	0.0200097
1	85112982	0.0197308
1	85163188	0.019452
1	85213394	0.0191733
1	85263601	0.0188948
1	85313807	0.0186165
1	85364013	0.0183386
1	85414220	0.018061
1	85464426	0.017784
1	85514632	0.0175074
1	85564838	0.0172315
1	85615045	0.0169563
1	85665251	0.0166818
1	85715457	0.0164081
1	85765664	0.0161349
1	85815870	0.0158444
1	85866076	0.0155607
1	85916283	0.0152832
1	85966489	0.0150025
1	86016695	0.0147361
1	86066901	0.0144711
1	86117108	0.0142075
1	86167314	0.0139454
1	86217520	0.0136849
1	86267727	0.013426
1	86317933	0.0131688
1	86368139	0.0129133
1	86418346	0.0126597
1	86468552	0.012403
1	86518758	0.0120976
1	86568965	0.0118509
1	86619171	0.0116063
1	86669377	0.0113636
1	86719583	0.0111231
1	86769790	0.0108848
1	86819996	0.0106486
1	86870202	0.0104147
1	86920409	0.010183
1	86970615	0.00995369
1	87020821	0.00972668
1	87071028	0.00950203
1	87121234	0.00927902
1	87171440	0.00905899
1	87221646	0.00884206
1	87271853	0.0086276
1	87322059	0.00841563
1	87372265	0.00820617
1	87422472	0.00799924
1	87472678	0.00779483
1	87522884	0.00759298
1	87573091	0.00739367
1	87623297	0.00719693
1	87673503	0.00700274
1	87723709	0.00681112
1	87773916	0.00662207
1	87824122	0.00643557
1	87874328	0.00625164
1	87924535	0.00607026
1	87974741	0.00589143
1	88024947	0.00571513
1	88075154	0.00554137
1	88125360	0.00537013
1	88175566	0.00520139
1	88225773	0.00503514
1	88275979	0.00487137
1	88326185	0.00471007
1	88376391	0.00455121
1	88426598	0.00439478
1	88476804	0.00424076
1	88527010	0.00408912
1	88577217	0.00393986
1	88627423	0.00379295
1	88677629	0.00361721
1	88727836	0.00346157
1	88778042	0.00332301
1	88828248	0.00318668
1	88878454	0.00305254
1	88928661	0.00292059
1	88978867	0.0027908
1	89029073	0.00266314
1	89079280	0.00253759
1	89129486	0.00241413
1	89179692	0.00229273
1	89229899	0.00217338
1	89280105	0.00203626
1	89330311	0.00189264
1	89380517	0.00178936
1	89430724	0.00168327
1	89480930	0.00157559
1	89531136	0.00146977
1	89581343	0.00136581
1	89631549	0.00127226
1	89681755	0.0011758
1	89731962	0.00107754
1	89782168	0.000981061
1	89832374	0.000886328
1	89882581	0.000793329
1	89932787	0.000702046
1	89982993	0.000612461
1	90033199	0.000524556
1	90083406	0.000438316
1	90133612	0.000353724
1	90183818	0.000270763
1	90234025	0.000189418
1	90284231	9.22e-05
1	90334437	0
1	90384644	0
1	90434850	0
1	90485056	0
1	90535262	0
1	90585469	0
1	90635675	0
1	90685881	0
1	90736088	0
1	90786294	0
1	90836500	0
1	90886707	0
1	90936913	0
1	90987119	0
1	91037325	0
1	91087532	0
1	91137738	0
1	91187944	0
1	91238151	0
1	91288357	0
1	91338563	0
1	91388770	0
1	91438976	0
1	91489182	0
1	91539389	0
1	91589595	0
1	91639801	0
1	91690007	0
1	91740214	0
1	91790420	0
1	91840626	0
1	91890833	0
1	91941039	0
1	91991245	0
1	92041452	0
1	92091658	0
1	92141864	0
1	92192070	0
1	92242277	0
1	92292483	0
1	92342689	0
1	92392896	0
1	92443102	0
1	92493308	0
1	92543515	0
1	92593721	0
1	92643927	0
1	92694133	0
1	92744340	0
1	92794546	0
1	92844752	0
1	92894959	0
1	92945165	0
1	92995371	0
1	93045578	0
1	93095784	0
1	93145990	0
1	93196197	0
1	93246403	0
1	93296609	0
1	93346815	0
1	93397022	0
1	93447228	0
1	93497434	0
1	93547641	0
1	93597847	0
1	93648053	0
1	93698260	0
1	93748466	0
1	93798672	0
1	93848878	0
1	93899085	0
1	93949291	0
1	93999497	0
1	94049704	0
1	94099910	0
1	94150116	0
1	94200323	0
1	94250529	0
1	94300735	0
1	94350941	0
1	94401148	0
1	94451354	0
1	94501560	0
1	94551767	0
1	94601973	0
1	94652179	0
1	94702386	0
1	94752592	0
1	94802798	0
1	94853005	0
1	94903211	0
1	94953417	0
1	95003623	0
1	95053830	0
1	95104036	0
1	95154242	0
1	95204449	0
1	95254655	0
1	95304861	0
1	95355068	0
1	95405274	0
1	95455480	0
1	95505686	0
1	95555893	0
1	95606099	0
1	95656305	0
1	95706512	0
1	95756718	0
1	95806924	0
1	95857131	0
1	95907337	0
1	95957543	0
1	96007749	0
1	96057956	0
1	96108162	0
1	96158368	0
1	96208575	0
1	96258781	0
1	96308987	0
1	96359194	0
1	96409400	0
1	96459606	0
1	96509813	0
1	96560019	0
1	96610225	0
1	96660431	0
1	96710638	0
1	96760844	0
1	96811050	0
1	96861257	0
1	96911463	0
1	96961669	0
1	97011876	0
1	97062082	0
1	97112288	0
1	97162494	0
1	97212701	0
1	97262907	0
1	97313113	0
1	97363320	0
1	97413526	0
1	97463732	0
1	97513939	0
1	97564145	0
1	97614351	0
1	97664557	0
1	97714764	0
1	97764970	0
1	97815176	0
1	97865383	0
1	97915589	0
1	97965795	0
1	98016002	0
1	98066208	0
1	98116414	0
1	98166621	0
1	98216827	0
1	98267033	0
1	98317239	0
1	98367446	0
1	98417652	0
1	98467858	0
1	98518065	0
1	98568271	0
1	98618477	0
1	98668684	0
1	98718890	0
1	98769096	0
1	98819302	0
1	98869509	0
1	98919715	0
1	98969921	0
1	99020128	0
1	99070334	0
1	99120540	0
1	99170747	0
1	99220953	0
1	99271159	0
1	99321365	0
1	99371572	0
1	99421778	0
1	99471984	0
1	99522191	0
1	99572397	0
1	99622603	0
1	99672810	0
1	99723016	0
1	99773222	0
1	99823429	0
1	99873635	0
1	99923841	0
1	99974047	0
1	100024254	0
1	100074460	0
1	100124666	0
1	100174873	0
1	100225079	0
1	100275285	0
1	100325492	0
1	100375698	0
1	100425904	0
[truncated: 68,002 more rows]
